# Supplementary material for: Evaluation on Flexibility of Phenomenological Hardening Law for Automotive Sheet Metals
Source: MDPI journal article supplement (doi:10.3390/met12040578), 2022-03-29
Supplement: s1 [file s1]

## Supplementary Material

# Flexibility Characterization of Phenomenological Hardening Law for Automotive Sheet Metals Using Ordinary Differential Equation

Quoc Tuan Pham <sup>1,2,\*</sup> and Young-Suk Kim <sup>3,\*</sup>

<sup>1</sup> Division of Computational Mathematics and Engineering, Institute for Computational Science, Ton Duc Thang University, Ho Chi Minh City 756000, Vietnam

<sup>2</sup> Faculty of Civil Engineering, Ton Duc Thang University, Ho Chi Minh City 756000, Vietnam

<sup>3</sup> School of Mechanical Engineering, Kyungpook National University, Daegu 41566, Korea

\* Correspondence: phamquoctuan@tdtu.edu.vn (Q.T.P.); caekim@knu.ac.kr (Y.S.K.)

## Supplementary Table

**Table S1:** Calibrated parameters of hardening laws for DP590 sheets

| Model          | Common curve fitting method |                |                |                |                | Constrained curve fitting method |                |                |                |                |
|----------------|-----------------------------|----------------|----------------|----------------|----------------|----------------------------------|----------------|----------------|----------------|----------------|
|                | C <sub>1</sub>              | C <sub>2</sub> | C <sub>3</sub> | C <sub>4</sub> | C <sub>5</sub> | C <sub>1</sub>                   | C <sub>2</sub> | C <sub>3</sub> | C <sub>4</sub> | C <sub>5</sub> |
| Voce           | 716.539                     | 306.106        | 17.977         |                |                | 773.222                          | 342.039        | 11.576         |                |                |
| Hockett-Shetby | 748.401                     | 356.650        | 9.395          | 0.814          |                | 821.406                          | 442.410        | 4.852          | 0.674          |                |
| Chinh et al.   | 748.359                     | 356.592        | 0.106          | 0.814          |                | 821.344                          | 442.303        | 0.206          | 0.674          |                |
| Hollomon       | 922.876                     | 0.146          |                |                |                | 928.306                          | 0.148          |                |                |                |
| Ludwik         | 320.796                     | 764.846        | 0.352          |                |                | 169.438                          | 765.611        | 0.196          |                |                |
| Swift          | 992.010                     | 0.00510        | 0.180          |                |                | 926.938                          | 0.00183        | 0.150          |                |                |
| Hollomon/Voce  | 0.130                       |                |                |                |                | 1.034                            |                |                |                |                |
| Swift/Voce     | 0.460                       |                |                |                |                | 0.719                            |                |                |                |                |
| Swift/HS       | 0.072                       |                |                |                |                | 0.726                            |                |                |                |                |
| Modified Voce  | 601.612                     | 201.310        | 30.545         | 701.956        |                | 614.466                          | 212.719        | 28.237         | 610.396        |                |
| Double Voce    | 824.871                     | 153.813        | 36.337         | 271.664        | 5.414          | 849.234                          | 160.810        | 35.558         | 289.055        | 4.624          |
| Ludwigson      | 1111.273                    | 0.455          | 5.833          | -2.282         |                | 945.199                          | 0.349          | 5.672          | -2.082         |                |
| Misiolek       | 784.940                     | 0.110          | 0.772          |                |                | 902.750                          | 0.140          | 0.058          |                |                |
| Pham and Kim   | 407.977                     | 625.217        | 61.003         | 0.394          |                | 409.781                          | 574.923        | 52.015         | 0.358          |                |

|                   |         |         |        |       |  |          |         |       |       |  |
|-------------------|---------|---------|--------|-------|--|----------|---------|-------|-------|--|
| <b>Proposed 1</b> | 919.473 | 88.108  | 0.036  | 0.535 |  | 1225.417 | 346.237 | 0.023 | 0.231 |  |
| <b>Proposed 2</b> | 389.719 | 346.632 | 13.126 | 0.741 |  | 371.508  | 423.504 | 7.202 | 0.559 |  |
| <b>Proposed 3</b> | 398.143 | 17.957  | 0.920  | 1.077 |  | 392.376  | 21.538  | 0.671 | 1.299 |  |
| <b>Proposed 4</b> | 398.965 | 26.036  | 3.748  | 0.609 |  | 399.584  | 25.312  | 3.407 | 0.620 |  |

**Table S2:** Calibrated parameters of hardening laws for DP780 sheets

| Model                 | Common curve fitting method |                |                |                |                | Constrained curve fitting method |                |                |                |                |
|-----------------------|-----------------------------|----------------|----------------|----------------|----------------|----------------------------------|----------------|----------------|----------------|----------------|
|                       | C <sub>1</sub>              | C <sub>2</sub> | C <sub>3</sub> | C <sub>4</sub> | C <sub>5</sub> | C <sub>1</sub>                   | C <sub>2</sub> | C <sub>3</sub> | C <sub>4</sub> | C <sub>5</sub> |
| <b>Voce</b>           | 928.515                     | 393.105        | 28.858         |                |                | 993.390                          | 424.433        | 17.945         |                |                |
| <b>Hockett-Shetby</b> | 1016.412                    | 548.576        | 6.943          | 0.624          |                | 1039.833                         | 578.262        | 5.905          | 0.592          |                |
| <b>Chinh et al.</b>   | 1016.142                    | 548.159        | 0.144          | 0.624          |                | 1039.800                         | 578.175        | 0.169          | 0.592          |                |
| <b>Hollomon</b>       | 1253.540                    | 0.139          |                |                |                | 1170.400                         | 0.117          |                |                |                |
| <b>Ludwik</b>         | 331.819                     | 1055.744       | 0.257          |                |                | -367.263                         | 1532.257       | 0.083          |                |                |
| <b>Swift</b>          | 1304.623                    | 0.00138        | 0.155          |                |                | 1170.133                         | 0.00010        | 0.117          |                |                |
| <b>Hollomon/Voce</b>  | 0.405                       |                |                |                |                | 0.743                            |                |                |                |                |
| <b>Swift/Voce</b>     | 0.720                       |                |                |                |                | 0.640                            |                |                |                |                |
| <b>Swift/HS</b>       | 0.088                       |                |                |                |                | 0.171                            |                |                |                |                |
| <b>Modified Voce</b>  | 772.971                     | 263.519        | 58.818         | 1394.896       |                | 828.179                          | 307.338        | 42.917         | 834.606        |                |
| <b>Double Voce</b>    | 977.509                     | 139.911        | 122.630        | 341.929        | 16.495         | 996.112                          | 158.730        | 105.458        | 339.439        | 14.002         |
| <b>Ludwigson</b>      | 1543.748                    | 0.380          | 5.993          | -3.892         |                | 1167.515                         | 0.117          | 1.000          | 0.169          |                |
| <b>Misiolek</b>       | 1160.631                    | 0.123          | 0.462          |                |                | 1170.399                         | 0.117          | 0.000          |                |                |
| <b>Pham and Kim</b>   | 510.988                     | 906.318        | 121.104        | 0.356          |                | 525.255                          | 712.215        | 72.433         | 0.273          |                |
| <b>Proposed 1</b>     | 1500.969                    | 367.945        | 0.009          | 0.213          |                | 1332.387                         | 222.621        | 0.011          | 0.291          |                |
| <b>Proposed 2</b>     | 454.368                     | 523.923        | 14.219         | 0.497          |                | 436.985                          | 572.667        | 10.626         | 0.435          |                |
| <b>Proposed 3</b>     | 486.349                     | 62.600         | 0.587          | 1.324          |                | 489.905                          | 55.200         | 0.641          | 1.258          |                |
| <b>Proposed 4</b>     | 506.266                     | 53.559         | 6.440          | 0.606          |                | 517.990                          | 39.804         | 3.084          | 0.677          |                |

**Table S3:** Calibrated parameters of hardening laws for DP980 sheets

| Model          | Common curve fitting method |                |                |                |                | Constrained curve fitting method |                |                |                |                |
|----------------|-----------------------------|----------------|----------------|----------------|----------------|----------------------------------|----------------|----------------|----------------|----------------|
|                | C <sub>1</sub>              | C <sub>2</sub> | C <sub>3</sub> | C <sub>4</sub> | C <sub>5</sub> | C <sub>1</sub>                   | C <sub>2</sub> | C <sub>3</sub> | C <sub>4</sub> | C <sub>5</sub> |
| Voce           | 1077.827                    | 254.548        | 98.222         |                |                | 1106.80                          | 259.99         | 64.21          | 0.00           |                |
| Hockett-Shetby | 1103.301                    | 317.915        | 23.485         | 0.691          |                | 1111.13                          | 330.65         | 19.28          | 0.65           |                |
| Chinh et al.   | 1103.259                    | 317.830        | 0.043          | 0.691          |                | 1111.13                          | 330.63         | 0.05           | 0.65           |                |
| Hollomon       | 1340.952                    | 0.067          |                |                |                | 1211.15                          | 0.04           |                |                |                |
| Ludwik         | 587.606                     | 874.833        | 0.174          |                |                | -0.88                            | 1212.02        | 0.04           |                |                |
| Swift          | 1383.736                    | 0.00047        | 0.075          |                |                | 1211.15                          | 0.00000        | 0.04           |                |                |
| Hollomon/Voce  | 0.347                       |                |                |                |                | 0.53                             |                |                |                |                |
| Swift/Voce     | 0.523                       |                |                |                |                | 0.46                             |                |                |                |                |
| Swift/HS       | 0.015                       |                |                |                |                | 0.52                             |                |                |                |                |
| Modified Voce  | 1008.844                    | 198.723        | 158.642        | 1809.113       |                | 1039.60                          | 223.19         | 125.04         | 941.20         |                |
| Double Voce    | 1094.606                    | 90.707         | 355.827        | 203.557        | 63.065         | 1103.41                          | 112.63         | 284.00         | 188.34         | 51.68          |
| Ludwigson      | 1339.412                    | 0.067          | 0.500          | 0.100          |                | 1210.07                          | 0.04           | 0.10           | -0.10          |                |
| Misiolek       | 1298.188                    | 0.062          | 0.480          |                |                | 1400.76                          | 0.07           | -0.73          |                |                |
| Pham and Kim   | 810.914                     | 644.254        | 250.729        | 0.274          |                | 817.90                           | 454.45         | 169.33         | 0.18           |                |
| Proposed 1     | 1179.664                    | 15.216         | 0.005          | 0.608          |                | 1139.26                          | 3.68           | 0.01           | 0.92           |                |
| Proposed 2     | 775.149                     | 318.020        | 60.532         | 0.540          |                | 758.65                           | 346.94         | 46.83          | 0.45           |                |
| Proposed 3     | 799.053                     | 119.000        | 0.837          | 0.537          |                | 802.98                           | 105.17         | 0.97           | 0.50           |                |
| Proposed 4     | 806.699                     | 131.404        | 11.051         | 0.328          |                | 812.27                           | 107.44         | 5.00           | 0.36           |                |

**Table S4:** Calibrated parameters of hardening laws for SPCC sheets

| Model                 | Common curve fitting method |                |                |                |                | Constrained curve fitting method |                |                |                |                |
|-----------------------|-----------------------------|----------------|----------------|----------------|----------------|----------------------------------|----------------|----------------|----------------|----------------|
|                       | C <sub>1</sub>              | C <sub>2</sub> | C <sub>3</sub> | C <sub>4</sub> | C <sub>5</sub> | C <sub>1</sub>                   | C <sub>2</sub> | C <sub>3</sub> | C <sub>4</sub> | C <sub>5</sub> |
| <b>Voce</b>           | 379.363                     | 202.833        | 14.272         |                |                | 390.272                          | 210.024        | 12.528         |                |                |
| <b>Hockett-Shetby</b> | 448.475                     | 291.629        | 4.343          | 0.689          |                | 396.938                          | 232.365        | 8.326          | 0.828          |                |
| <b>Chinh et al.</b>   | 448.708                     | 291.873        | 0.231          | 0.689          |                | 396.934                          | 232.352        | 0.120          | 0.828          |                |
| <b>Hollomon</b>       | 517.802                     | 0.199          |                |                |                | 465.359                          | 0.158          |                |                |                |
| <b>Ludwik</b>         | 129.675                     | 491.781        | 0.397          |                |                | -104.913                         | 568.103        | 0.122          |                |                |
| <b>Swift</b>          | 564.985                     | 0.00545        | 0.242          |                |                | 465.235                          | 0.00019        | 0.159          |                |                |
| <b>Hollomon/Voce</b>  | 0.254                       |                |                |                |                | 0.379                            |                |                |                |                |
| <b>Swift/Voce</b>     | 0.774                       |                |                |                |                | 0.245                            |                |                |                |                |
| <b>Swift/HS</b>       | -0.008                      |                |                |                |                | 0.466                            |                |                |                |                |
| <b>Modified Voce</b>  | 277.705                     | 108.945        | 30.486         | 551.805        |                | 337.502                          | 163.820        | 18.186         | 191.744        |                |
| <b>Double Voce</b>    | 399.911                     | 35.116         | 105.314        | 202.423        | 10.484         | 390.094                          | 29.374         | 161.043        | 200.600        | 11.980         |
| <b>Ludwigson</b>      | 484.691                     | 0.391          | 4.856          | -0.097         |                | 475.005                          | 0.251          | 4.302          | -2.535         |                |
| <b>Misiolek</b>       | 413.503                     | 0.147          | 0.987          |                |                | 545.777                          | 0.209          | -0.317         |                |                |
| <b>Pham and Kim</b>   | 171.643                     | 464.127        | 76.757         | 0.479          |                | 178.889                          | 301.679        | 30.261         | 0.280          |                |
| <b>Proposed 1</b>     | 694.230                     | 216.827        | 0.032          | 0.258          |                | 417.782                          | 6.808          | 0.118          | 1.681          |                |
| <b>Proposed 2</b>     | 154.041                     | 267.203        | 6.836          | 0.605          |                | 161.101                          | 231.951        | 10.295         | 0.724          |                |
| <b>Proposed 3</b>     | 161.107                     | 26.387         | 0.535          | 2.036          |                | 170.671                          | 15.190         | 1.085          | 1.338          |                |
| <b>Proposed 4</b>     | 167.868                     | 28.164         | 6.111          | 0.714          |                | 173.542                          | 18.011         | 1.179          | 0.961          |                |

**Table S5:** Calibrated parameters of hardening laws for TRIP980 sheets

| Model                 | Common curve fitting method |                |                |                |                | Constrained curve fitting method |                |                |                |                |
|-----------------------|-----------------------------|----------------|----------------|----------------|----------------|----------------------------------|----------------|----------------|----------------|----------------|
|                       | C <sub>1</sub>              | C <sub>2</sub> | C <sub>3</sub> | C <sub>4</sub> | C <sub>5</sub> | C <sub>1</sub>                   | C <sub>2</sub> | C <sub>3</sub> | C <sub>4</sub> | C <sub>5</sub> |
| <b>Voce</b>           | 1207.540                    | 574.531        | 21.054         |                |                | 1234.143                         | 590.376        | 18.678         |                |                |
| <b>Hockett-Shetby</b> | 1212.312                    | 582.196        | 19.726         | 0.982          |                | 1238.252                         | 615.242        | 15.347         | 0.922          |                |
| <b>Chinh et al.</b>   | 1212.305                    | 582.185        | 0.051          | 0.982          |                | 1238.247                         | 615.211        | 0.065          | 0.922          |                |
| <b>Hollomon</b>       | 1685.091                    | 0.171          |                |                |                | 1453.460                         | 0.120          |                |                |                |
| <b>Ludwik</b>         | 497.450                     | 1603.354       | 0.390          |                |                | 1.000                            | 1452.487       | 0.120          |                |                |
| <b>Swift</b>          | 1866.017                    | 0.005          | 0.216          |                |                | 1453.326                         | 0.00009        | 0.120          |                |                |
| <b>Hollomon/Voce</b>  | -0.010                      |                |                |                |                | 0.280                            |                |                |                |                |
| <b>Swift/Voce</b>     | 0.049                       |                |                |                |                | 0.185                            |                |                |                |                |
| <b>Swift/HS</b>       | 0.009                       |                |                |                |                | 0.574                            |                |                |                |                |
| <b>Modified Voce</b>  | 1124.146                    | 495.299        | 24.507         | 568.646        |                | 1136.406                         | 507.014        | 23.938         | 479.587        |                |
| <b>Double Voce</b>    | 1283.269                    | 437.553        | 25.771         | 216.780        | 6.630          | 1285.856                         | 435.440        | 25.885         | 221.569        | 6.576          |
| <b>Ludwigson</b>      | 1578.975                    | 0.386          | 6.207          | -0.109         |                | 1542.930                         | 0.247          | 5.799          | -3.396         |                |
| <b>Misiolek</b>       | 1401.262                    | 0.131          | 1.045          |                |                | 1829.351                         | 0.187          | -0.559         |                |                |
| <b>Pham and Kim</b>   | 642.442                     | 1005.660       | 45.938         | 0.306          |                | 641.967                          | 823.605        | 35.555         | 0.211          |                |
| <b>Proposed 1</b>     | 1276.190                    | 2.170          | 0.142          | 2.925          |                | 1261.879                         | 1.246          | 0.165          | 3.464          |                |
| <b>Proposed 2</b>     | 631.639                     | 577.350        | 20.803         | 0.988          |                | 623.818                          | 612.512        | 17.736         | 0.894          |                |
| <b>Proposed 3</b>     | 633.211                     | 17.500         | 1.411          | 1.030          |                | 633.184                          | 17.500         | 1.408          | 1.031          |                |
| <b>Proposed 4</b>     | 628.576                     | 22.614         | 0.829          | 0.870          |                | 628.487                          | 22.662         | 0.852          | 0.869          |                |

**Table S6:** Calibrated parameters of hardening laws for TRIP1180 sheets

| Model                 | Common curve fitting method |                |                |                |                | Constrained curve fitting method |                |                |                |                |
|-----------------------|-----------------------------|----------------|----------------|----------------|----------------|----------------------------------|----------------|----------------|----------------|----------------|
|                       | C <sub>1</sub>              | C <sub>2</sub> | C <sub>3</sub> | C <sub>4</sub> | C <sub>5</sub> | C <sub>1</sub>                   | C <sub>2</sub> | C <sub>3</sub> | C <sub>4</sub> | C <sub>5</sub> |
| <b>Voce</b>           | 2606.549                    | 1679.989       | 1.463          |                |                | 1810.278                         | 897.690        | 3.288          |                |                |
| <b>Hockett-Shetby</b> | 3177.335                    | 2254.693       | 0.985          | 0.956          |                | 1653.389                         | 717.553        | 6.020          | 1.211          |                |
| <b>Chinh et al.</b>   | 3150.428                    | 2227.165       | 0.996          | 0.960          |                | 1653.531                         | 717.818        | 0.166          | 1.210          |                |
| <b>Hollomon</b>       | 1604.621                    | 0.126          |                |                |                | 1989.108                         | 0.229          |                |                |                |
| <b>Ludwik</b>         | 916.834                     | 1770.579       | 0.871          |                |                | 857.206                          | 1274.142       | 0.606          |                |                |
| <b>Swift</b>          | 2242.666                    | 0.212          | 0.569          |                |                | 1987.016                         | 0.07461        | 0.304          |                |                |
| <b>Hollomon/Voce</b>  | 0.049                       |                |                |                |                | 0.368                            |                |                |                |                |
| <b>Swift/Voce</b>     | 1.000                       |                |                |                |                | 0.500                            |                |                |                |                |
| <b>Swift/HS</b>       | -0.008                      |                |                |                |                | 0.481                            |                |                |                |                |
| <b>Modified Voce</b>  | 946.931                     | 82.116         | 288.943        | 2042.834       |                | 1810.249                         | 897.639        | 3.288          | 0.101          |                |
| <b>Double Voce</b>    | 2930.995                    | 75.923         | 501.529        | 1997.707       | 1.178          | 1842.304                         | 868.283        | 3.349          | 61.464         | 0.768          |
| <b>Ludwigson</b>      | 1749.988                    | 0.869          | 6.821          | -0.021         |                | 873.739                          | 0.551          | 6.773          | 0.562          |                |
| <b>Misiolek</b>       | 1052.007                    | 0.024          | 1.461          |                |                | 1285.885                         | 0.068          | 0.704          |                |                |
| <b>Pham and Kim</b>   | 913.107                     | 1779.230       | 412.246        | 0.874          |                | 841.946                          | 1282.124       | 6037.887       | 0.594          |                |
| <b>Proposed 1</b>     | 3280.387                    | 2105.845       | 0.892          | 0.994          |                | 2270.367                         | 619.869        | 0.506          | 1.154          |                |
| <b>Proposed 2</b>     | 917.023                     | 15387.850      | 0.086          | 0.875          |                | 934.134                          | 772.594        | 4.675          | 1.251          |                |
| <b>Proposed 3</b>     | 931.589                     | 2.167          | 2.043          | 1.111          |                | 929.095                          | 3.993          | 12.790         | 0.644          |                |
| <b>Proposed 4</b>     | 926.687                     | 0.046          | 4.645          | 0.572          |                | 902.561                          | 0.047          | 13.354         | 0.304          |                |

**Table S7:** Calibrated parameters of hardening laws for AA6016 sheets

| Model                 | Common curve fitting method |                |                |                |                | Constrained curve fitting method |                |                |                |                |
|-----------------------|-----------------------------|----------------|----------------|----------------|----------------|----------------------------------|----------------|----------------|----------------|----------------|
|                       | C <sub>1</sub>              | C <sub>2</sub> | C <sub>3</sub> | C <sub>4</sub> | C <sub>5</sub> | C <sub>1</sub>                   | C <sub>2</sub> | C <sub>3</sub> | C <sub>4</sub> | C <sub>5</sub> |
| <b>Voce</b>           | 313.363                     | 186.250        | 10.618         |                |                | 330.635                          | 198.235        | 8.616          |                |                |
| <b>Hockett-Shetby</b> | 329.870                     | 209.181        | 7.024          | 0.873          |                | 339.796                          | 220.834        | 5.955          | 0.833          |                |
| <b>Chinh et al.</b>   | 329.870                     | 209.180        | 0.142          | 0.873          |                | 339.787                          | 220.816        | 0.168          | 0.833          |                |
| <b>Hollomon</b>       | 431.410                     | 0.241          |                |                |                | 395.139                          | 0.203          |                |                |                |
| <b>Ludwik</b>         | 88.761                      | 411.847        | 0.421          |                |                | 0.000                            | 395.139        | 0.203          |                |                |
| <b>Swift</b>          | 465.341                     | 0.00745        | 0.286          |                |                | 394.952                          | 0.00057        | 0.204          |                |                |
| <b>Hollomon/Voce</b>  | 0.112                       |                |                |                |                | 0.537                            | 395.139        | 0.203          | 330.635        | 198.235        |
| <b>Swift/Voce</b>     | 0.327                       |                |                |                |                | 0.374                            | 394.952        | 0.001          | 0.204          | 330.635        |
| <b>Swift/HS</b>       | 0.021                       |                |                |                |                | 0.634                            | 394.952        | 0.001          | 0.204          | 339.796        |
| <b>Modified Voce</b>  | 245.525                     | 121.713        | 16.394         | 262.976        |                | 263.610                          | 138.810        | 14.243         | 184.166        |                |
| <b>Double Voce</b>    | 356.470                     | 73.877         | 21.214         | 159.170        | 4.698          | 339.652                          | 53.898         | 24.328         | 162.382        | 6.268          |
| <b>Ludwigson</b>      | 484.547                     | 0.468          | 4.531          | 1.453          |                | 394.170                          | 0.204          |                |                |                |
| <b>Misiolek</b>       | 356.071                     | 0.192          | 0.665          |                |                | 455.733                          | 0.253          | -0.243         |                |                |
| <b>Pham and Kim</b>   | 129.215                     | 336.371        | 37.586         | 0.445          |                | 130.621                          | 281.043        | 26.167         | 0.344          |                |
| <b>Proposed 1</b>     | 394.339                     | 33.760         | 0.105          | 0.926          |                | 379.710                          | 24.659         | 0.121          | 1.109          |                |
| <b>Proposed 2</b>     | 120.012                     | 204.114        | 8.422          | 0.825          |                | 117.116                          | 217.758        | 7.053          | 0.752          |                |
| <b>Proposed 3</b>     | 123.361                     | 11.500         | 0.966          | 1.663          |                | 123.536                          | 11.400         | 0.995          | 1.639          |                |
| <b>Proposed 4</b>     | 123.789                     | 16.314         | 2.162          | 0.989          |                | 124.992                          | 14.651         | 1.329          | 1.070          |                |

**Table S8:** Calibrated parameters of hardening laws for AA6022 sheets

| Model                 | Common curve fitting method |                |                |                |                | Constrained curve fitting method |                |                |                |                |
|-----------------------|-----------------------------|----------------|----------------|----------------|----------------|----------------------------------|----------------|----------------|----------------|----------------|
|                       | C <sub>1</sub>              | C <sub>2</sub> | C <sub>3</sub> | C <sub>4</sub> | C <sub>5</sub> | C <sub>1</sub>                   | C <sub>2</sub> | C <sub>3</sub> | C <sub>4</sub> | C <sub>5</sub> |
| <b>Voce</b>           | 382.879                     | 226.170        | 8.255          |                |                | 409.054                          | 245.700        | 6.510          |                |                |
| <b>Hockett-Shetby</b> | 408.156                     | 260.389        | 5.361          | 0.862          |                | 431.576                          | 287.825        | 4.146          | 0.798          |                |
| <b>Chinh et al.</b>   | 408.428                     | 260.713        | 0.187          | 0.862          |                | 431.533                          | 287.750        | 0.241          | 0.798          |                |
| <b>Hollomon</b>       | 504.295                     | 0.248          |                |                |                | 486.354                          | 0.231          |                |                |                |
| <b>Ludwik</b>         | 100.220                     | 465.779        | 0.410          |                |                | -1.000                           | 487.321        | 0.231          |                |                |
| <b>Swift</b>          | 538.698                     | 0.01017        | 0.293          |                |                | 486.155                          | 0.00073        | 0.232          |                |                |
| <b>Hollomon/Voce</b>  | 0.145                       |                |                |                |                | 0.741                            |                |                |                |                |
| <b>Swift/Voce</b>     | 0.365                       |                |                |                |                | 0.489                            |                |                |                |                |
| <b>Swift/HS</b>       | 0.016                       |                |                |                |                | 0.681                            |                |                |                |                |
| <b>Modified Voce</b>  | 294.280                     | 141.401        | 12.997         | 279.747        |                | 305.411                          | 151.919        | 12.060         | 238.954        |                |
| <b>Double Voce</b>    | 423.707                     | 63.048         | 19.577         | 208.564        | 4.629          | 437.516                          | 76.702         | 17.924         | 208.655        | 3.905          |
| <b>Ludwigson</b>      | 531.310                     | 0.457          | 4.675          | 1.079          |                | 486.354                          | 0.231          | -12.256        | 9.540          |                |
| <b>Misiolek</b>       | 431.084                     | 0.206          | 0.483          |                |                | 513.190                          | 0.251          | -0.085         |                |                |
| <b>Pham and Kim</b>   | 160.949                     | 388.389        | 31.512         | 0.484          |                | 162.294                          | 345.268        | 24.243         | 0.414          |                |
| <b>Proposed 1</b>     | 530.706                     | 87.558         | 0.111          | 0.668          |                | 539.683                          | 94.416         | 0.109          | 0.639          |                |
| <b>Proposed 2</b>     | 146.182                     | 254.078        | 6.249          | 0.804          |                | 140.175                          | 280.943        | 4.834          | 0.708          |                |
| <b>Proposed 3</b>     | 151.668                     | 8.848          | 0.924          | 1.704          |                | 150.761                          | 9.120          | 0.867          | 1.768          |                |
| <b>Proposed 4</b>     | 152.723                     | 12.716         | 1.990          | 0.950          |                | 153.462                          | 12.034         | 1.576          | 0.993          |                |



**Table S9:** Calibrated parameters of hardening laws for AA7075 sheets

| Model                 | Common curve fitting method |                |                |                |                | Constrained curve fitting method |                |                |                |                |
|-----------------------|-----------------------------|----------------|----------------|----------------|----------------|----------------------------------|----------------|----------------|----------------|----------------|
|                       | C <sub>1</sub>              | C <sub>2</sub> | C <sub>3</sub> | C <sub>4</sub> | C <sub>5</sub> | C <sub>1</sub>                   | C <sub>2</sub> | C <sub>3</sub> | C <sub>4</sub> | C <sub>5</sub> |
| <b>Voce</b>           | 638.716                     | 153.558        | 19.722         |                |                | 636.747                          | 151.950        | 20.236         |                |                |
| <b>Hockett-Shetby</b> | 658.001                     | 176.032        | 11.977         | 0.893          |                | 637.362                          | 153.224        | 19.307         | 0.985          |                |
| <b>Chinh et al.</b>   | 658.060                     | 176.098        | 0.084          | 0.892          |                | 637.356                          | 153.211        | 0.052          | 0.986          |                |
| <b>Hollomon</b>       | 697.154                     | 0.062          |                |                |                | 742.129                          | 0.080          |                |                |                |
| <b>Ludwik</b>         | 469.233                     | 550.801        | 0.537          |                |                | 411.043                          | 359.263        | 0.255          |                |                |
| <b>Swift</b>          | 824.204                     | 0.01537        | 0.129          |                |                | 741.766                          | 0.00472        | 0.085          |                |                |
| <b>Hollomon/Voce</b>  | 0.046                       |                |                |                |                | 0.103                            |                |                |                |                |
| <b>Swift/Voce</b>     | 0.413                       |                |                |                |                | -0.080                           |                |                |                |                |
| <b>Swift/HS</b>       | -0.011                      |                |                |                |                | 0.627                            |                |                |                |                |
| <b>Modified Voce</b>  | 591.882                     | 107.487        | 26.240         | 363.290        |                | 636.747                          | 151.949        | 20.236         |                |                |
| <b>Double Voce</b>    | 695.640                     | 86.077         | 28.790         | 125.193        | 5.705          | 638.178                          | 151.398        | 20.301         | 2.000          | 2.000          |
| <b>Ludwigson</b>      | 523.134                     | 0.526          | 6.150          | -0.100         |                | 358.169                          | 0.234          | 5.991          | 0.053          |                |
| <b>Misiolek</b>       | 575.928                     | 0.026          | 1.641          |                |                | 660.565                          | 0.051          | 0.368          |                |                |
| <b>Pham and Kim</b>   | 487.584                     | 473.823        | 85.180         | 0.545          |                | 487.610                          | 285.577        | 50.121         | 0.347          |                |
| <b>Proposed 1</b>     | 725.125                     | 20.891         | 0.064          | 0.888          |                | 650.636                          | 0.424          | 0.159          | 3.256          |                |
| <b>Proposed 2</b>     | 481.313                     | 172.149        | 14.881         | 0.848          |                | 483.660                          | 153.593        | 19.698         | 0.965          |                |
| <b>Proposed 3</b>     | 483.425                     | 12.154         | 0.949          | 0.591          |                | 485.469                          | 13.737         | 1.600          | 0.430          |                |
| <b>Proposed 4</b>     | 484.025                     | 17.227         | 1.678          | 0.360          |                | 483.080                          | 17.321         | 0.000          | 0.405          |                |

**Table S10:** Calibrated parameters of hardening laws for AA5052 sheets

| Model                 | Common curve fitting method |                |                |                |                | Constrained curve fitting method |                |                |                |                |
|-----------------------|-----------------------------|----------------|----------------|----------------|----------------|----------------------------------|----------------|----------------|----------------|----------------|
|                       | C <sub>1</sub>              | C <sub>2</sub> | C <sub>3</sub> | C <sub>4</sub> | C <sub>5</sub> | C <sub>1</sub>                   | C <sub>2</sub> | C <sub>3</sub> | C <sub>4</sub> | C <sub>5</sub> |
| <b>Voce</b>           | 253.617                     | 76.475         | 27.458         |                |                | 257.815                          | 79.227         | 24.022         |                |                |
| <b>Hockett-Shetby</b> | 252.747                     | 75.170         | 30.219         | 1.024          |                | 258.680                          | 82.573         | 19.007         | 0.921          |                |
| <b>Chinh et al.</b>   | 252.740                     | 75.162         | 0.033          | 1.024          |                | 258.678                          | 82.568         | 0.053          | 0.921          |                |
| <b>Hollomon</b>       | 304.747                     | 0.090          |                |                |                | 299.570                          | 0.085          |                |                |                |
| <b>Ludwik</b>         | 162.215                     | 245.339        | 0.417          |                |                | 71.077                           | 230.372        | 0.120          |                |                |
| <b>Swift</b>          | 345.545                     | 0.00675        | 0.137          |                |                | 299.295                          | 0.00084        | 0.086          |                |                |
| <b>Hollomon/Voce</b>  | 0.005                       |                |                |                |                | 0.742                            |                |                |                |                |
| <b>Swift/Voce</b>     | -0.050                      |                |                |                |                | 0.254                            |                |                |                |                |
| <b>Swift/HS</b>       | 0.020                       |                |                |                |                | 0.662                            |                |                |                |                |
| <b>Modified Voce</b>  | 253.617                     | 76.476         | 27.457         | 0.000          |                | 244.435                          | 67.232         | 30.185         | 90.555         |                |
| <b>Double Voce</b>    | 253.622                     | 76.478         | 27.452         | 0.000          | 2.125          | 265.015                          | 76.453         | 25.128         | 10.447         | 2.326          |
| <b>Ludwigson</b>      | 293.478                     | 0.096          | 2.525          | -0.101         |                | 336.605                          | 0.390          | 5.003          | -3.009         |                |
| <b>Misiolek</b>       | 251.445                     | 0.053          | 1.538          |                |                | 300.915                          | 0.086          | -0.014         |                |                |
| <b>Pham and Kim</b>   | 177.766                     | 87.839         | 32.959         | 0.077          |                | 178.597                          | 128.032        | 50.352         | 0.254          |                |
| <b>Proposed 1</b>     | 264.751                     | 0.226          | 0.100          | 2.587          |                | 292.856                          | 14.357         | 0.017          | 0.526          |                |
| <b>Proposed 2</b>     | 177.625                     | 75.391         | 28.496         | 1.037          |                | 175.846                          | 82.277         | 22.263         | 0.875          |                |
| <b>Proposed 3</b>     | 177.766                     | 19.300         | 1.698          | 0.549          |                | 177.283                          | 19.200         | 1.404          | 0.593          |                |
| <b>Proposed 4</b>     | 176.140                     | 25.655         | 1.073          | 0.494          |                | 177.442                          | 22.170         | 0.082          | 0.537          |                |

**Table S11:** Calibrated parameters of hardening laws for AA6021 sheets

| Model                 | Common curve fitting method |                |                |                |                | Constrained curve fitting method |                |                |                |                |
|-----------------------|-----------------------------|----------------|----------------|----------------|----------------|----------------------------------|----------------|----------------|----------------|----------------|
|                       | C <sub>1</sub>              | C <sub>2</sub> | C <sub>3</sub> | C <sub>4</sub> | C <sub>5</sub> | C <sub>1</sub>                   | C <sub>2</sub> | C <sub>3</sub> | C <sub>4</sub> | C <sub>5</sub> |
| <b>Voce</b>           | 347.189                     | 198.799        | 12.968         |                |                | 344.862                          | 197.264        | 13.344         |                |                |
| <b>Hockett-Shetby</b> | 358.471                     | 214.116        | 9.732          | 0.918          |                | 344.935                          | 197.634        | 13.233         | 0.996          |                |
| <b>Chinh et al.</b>   | 358.460                     | 214.091        | 0.103          | 0.919          |                | 344.934                          | 197.627        | 0.076          | 0.996          |                |
| <b>Hollomon</b>       | 489.516                     | 0.227          |                |                |                | 408.709                          | 0.158          |                |                |                |
| <b>Ludwik</b>         | 113.687                     | 492.307        | 0.447          |                |                | -267.118                         | 672.048        | 0.084          |                |                |
| <b>Swift</b>          | 544.722                     | 0.00770        | 0.283          |                |                | 408.663                          | 0.00010        | 0.158          |                |                |
| <b>Hollomon/Voce</b>  | 0.056                       |                |                |                |                | -0.092                           |                |                |                |                |
| <b>Swift/Voce</b>     | 0.228                       |                |                |                |                | -0.054                           |                |                |                |                |
| <b>Swift/HS</b>       | 0.011                       |                |                |                |                | 0.544                            |                |                |                |                |
| <b>Modified Voce</b>  | 289.658                     | 143.294        | 17.611         | 269.909        |                | 344.862                          | 197.265        | 13.345         | 0.000          |                |
| <b>Double Voce</b>    | 364.706                     | 41.365         | 30.227         | 177.496        | 9.221          | 344.862                          | 22.636         | 13.401         | 174.627        | 13.337         |
| <b>Ludwigson</b>      | 485.381                     | 0.443          | 4.729          | -0.102         |                | 406.699                          | 0.158          | -0.212         | -0.089         |                |
| <b>Misiolek</b>       | 378.414                     | 0.166          | 1.087          |                |                | 551.210                          | 0.252          | -0.600         |                |                |
| <b>Pham and Kim</b>   | 151.760                     | 388.420        | 42.769         | 0.442          |                | 147.597                          | 241.357        | 20.308         | 0.159          |                |
| <b>Proposed 1</b>     | 493.111                     | 69.868         | 0.065          | 0.587          |                | 374.717                          | 8.792          | 0.081          | 1.311          |                |
| <b>Proposed 2</b>     | 143.969                     | 210.765        | 11.182         | 0.886          |                | 146.946                          | 197.963        | 13.260         | 0.988          |                |
| <b>Proposed 3</b>     | 146.204                     | 12.700         | 1.068          | 1.505          |                | 149.854                          | 11.700         | 1.579          | 1.274          |                |
| <b>Proposed 4</b>     | 146.319                     | 17.529         | 1.894          | 0.986          |                | 148.411                          | 14.290         | 0.106          | 1.190          |                |

**Table S12:** Calibrated parameters of hardening laws for AA3004 sheets

| Model                 | Common curve fitting method |                |                |                |                | Constrained curve fitting method |                |                |                |                |
|-----------------------|-----------------------------|----------------|----------------|----------------|----------------|----------------------------------|----------------|----------------|----------------|----------------|
|                       | C <sub>1</sub>              | C <sub>2</sub> | C <sub>3</sub> | C <sub>4</sub> | C <sub>5</sub> | C <sub>1</sub>                   | C <sub>2</sub> | C <sub>3</sub> | C <sub>4</sub> | C <sub>5</sub> |
| <b>Voce</b>           | 195.525                     | 110.980        | 12.936         |                |                | 201.268                          | 114.727        | 11.401         |                |                |
| <b>Hockett-Shetby</b> | 221.848                     | 146.159        | 5.105          | 0.741          |                | 204.700                          | 125.891        | 7.984          | 0.844          |                |
| <b>Chinh et al.</b>   | 221.687                     | 145.956        | 0.195          | 0.742          |                | 204.699                          | 125.888        | 0.125          | 0.844          |                |
| <b>Hollomon</b>       | 272.254                     | 0.221          |                |                |                | 240.748                          | 0.172          |                |                |                |
| <b>Ludwik</b>         | 57.957                      | 259.602        | 0.394          |                |                | 0.000                            | 240.748        | 0.172          |                |                |
| <b>Swift</b>          | 293.336                     | 0.00538        | 0.261          |                |                | 240.720                          | 0.00010        | 0.172          |                |                |
| <b>Hollomon/Voce</b>  | 0.248                       |                |                |                |                | 0.339                            |                |                |                |                |
| <b>Swift/Voce</b>     | 0.611                       |                |                |                |                | 0.237                            |                |                |                |                |
| <b>Swift/HS</b>       | 0.002                       |                |                |                |                | 0.508                            |                |                |                |                |
| <b>Modified Voce</b>  | 146.558                     | 65.141         | 23.629         | 235.334        |                | 173.632                          | 90.390         | 16.146         | 92.326         |                |
| <b>Double Voce</b>    | 200.920                     | 14.963         | 174.086        | 110.598        | 11.090         | 201.245                          | 15.092         | 168.406        | 110.688        | 11.002         |
| <b>Ludwigson</b>      | 253.488                     | 0.363          | 3.958          | -0.101         |                | 240.747                          | 0.172          | -10.788        | 0.009          |                |
| <b>Misiolek</b>       | 223.473                     | 0.173          | 0.786          |                |                | 294.439                          | 0.237          | -0.384         |                |                |
| <b>Pham and Kim</b>   | 83.848                      | 230.860        | 56.307         | 0.464          |                | 86.363                           | 160.331        | 26.750         | 0.280          |                |
| <b>Proposed 1</b>     | 627.774                     | 371.951        | 0.026          | 0.107          |                | 213.917                          | 3.188          | 0.161          | 2.036          |                |
| <b>Proposed 2</b>     | 74.326                      | 137.657        | 7.384          | 0.658          |                | 77.031                           | 125.767        | 9.547          | 0.746          |                |
| <b>Proposed 3</b>     | 77.928                      | 20.100         | 0.643          | 1.949          |                | 82.171                           | 13.600         | 1.120          | 1.441          |                |
| <b>Proposed 4</b>     | 81.144                      | 22.645         | 3.926          | 0.849          |                | 83.324                           | 16.542         | 1.048          | 1.052          |                |

## Supplementary Figure

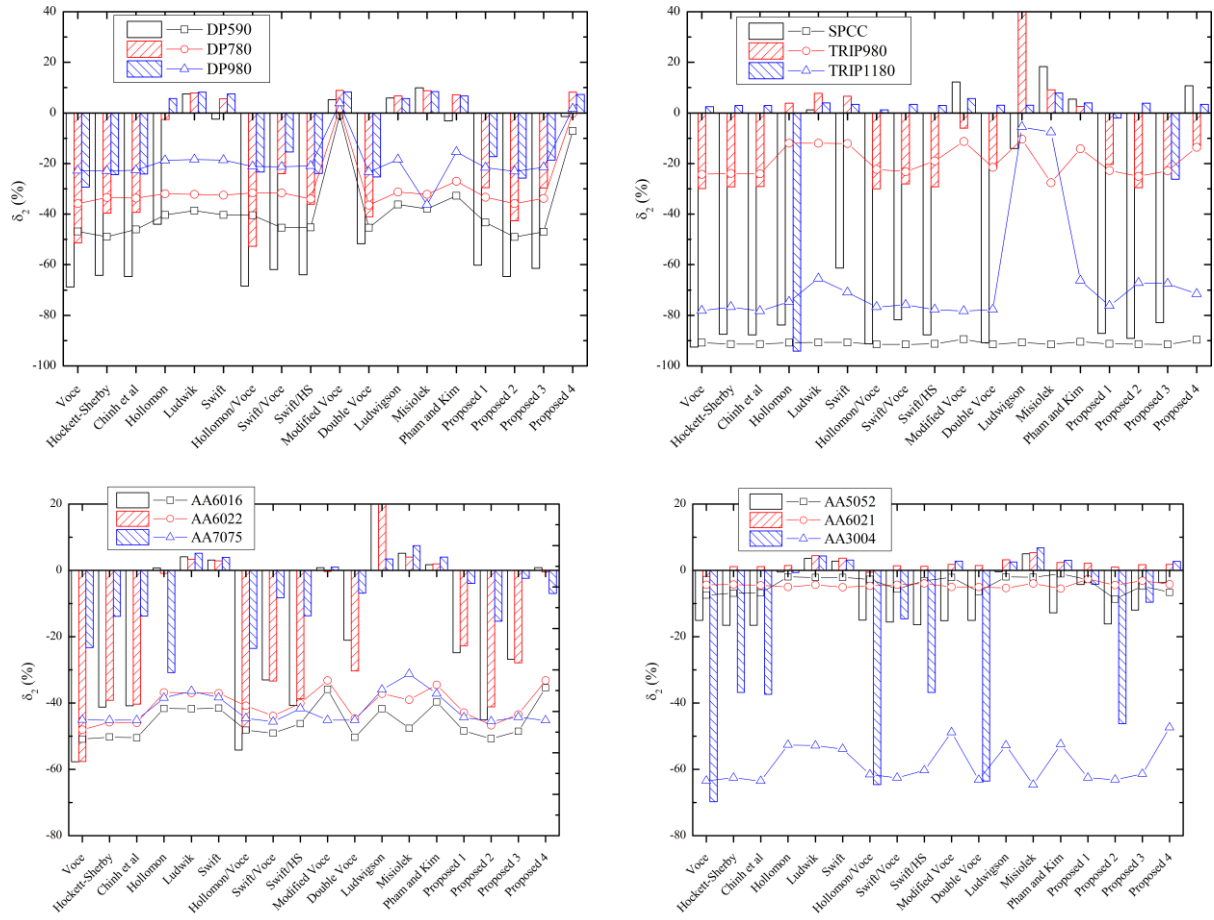

**Figure S1.** Calculated  $\delta_2$  of all identified hardening laws for tested materials. Column charts indicate the results of the common curve fitting method; opened-symbols indicate the results of the constrained curve fitting method.
